# Supplementary material for: Prussian blue analogues Mn[Fe(CN)6]0.6667·nH2O cubes as an anode material for lithium-ion batteries
Source: Royal Society of Chemistry journal article supplement (doi:10.1039/c5dt03030g), 2015-01-01
Supplement: c5dt03030g1.pdf [file c5dt03030g1.pdf]

## Supporting Information

### **Prussian Blue analogues $\text{Mn}[\text{Fe}(\text{CN})_6]_{0.6667} \cdot n\text{H}_2\text{O}$ cubes as an anode material for lithium-ion batteries**

Peixun Xiong,<sup>a,b</sup> Guojin Zeng,<sup>a,b</sup> Lingxing Zeng,<sup>a,b</sup> Mingdeng Wei<sup>\*a,b</sup>

<sup>a</sup> State Key Laboratory of Photocatalysis on Energy and Environment, Fuzhou University, Fuzhou, Fujian 350002, China

<sup>b</sup> Institute of Advanced Energy Materials, Fuzhou University, Fuzhou, Fujian 350002, China

\*Corresponding author: Mingdeng Wei

Tel./fax: +86-591-83753180

*E-mail address:* [wei-mingdeng@fzu.edu.cn](mailto:wei-mingdeng@fzu.edu.cn)

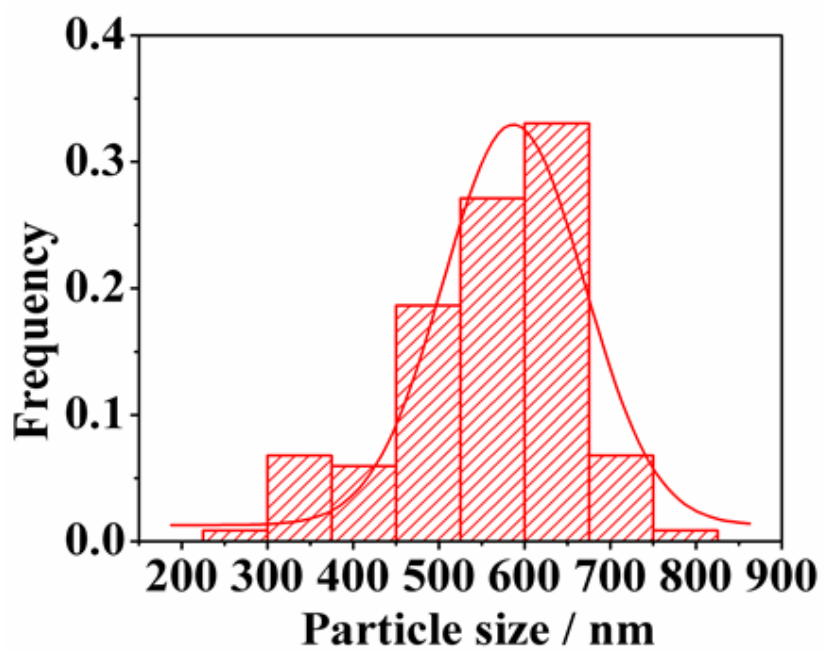

**Fig. S1** Particle size distribution histograms of  $\text{Mn}[\text{Fe}(\text{CN})_6]_{0.6667} \cdot n\text{H}_2\text{O}$  cubes.

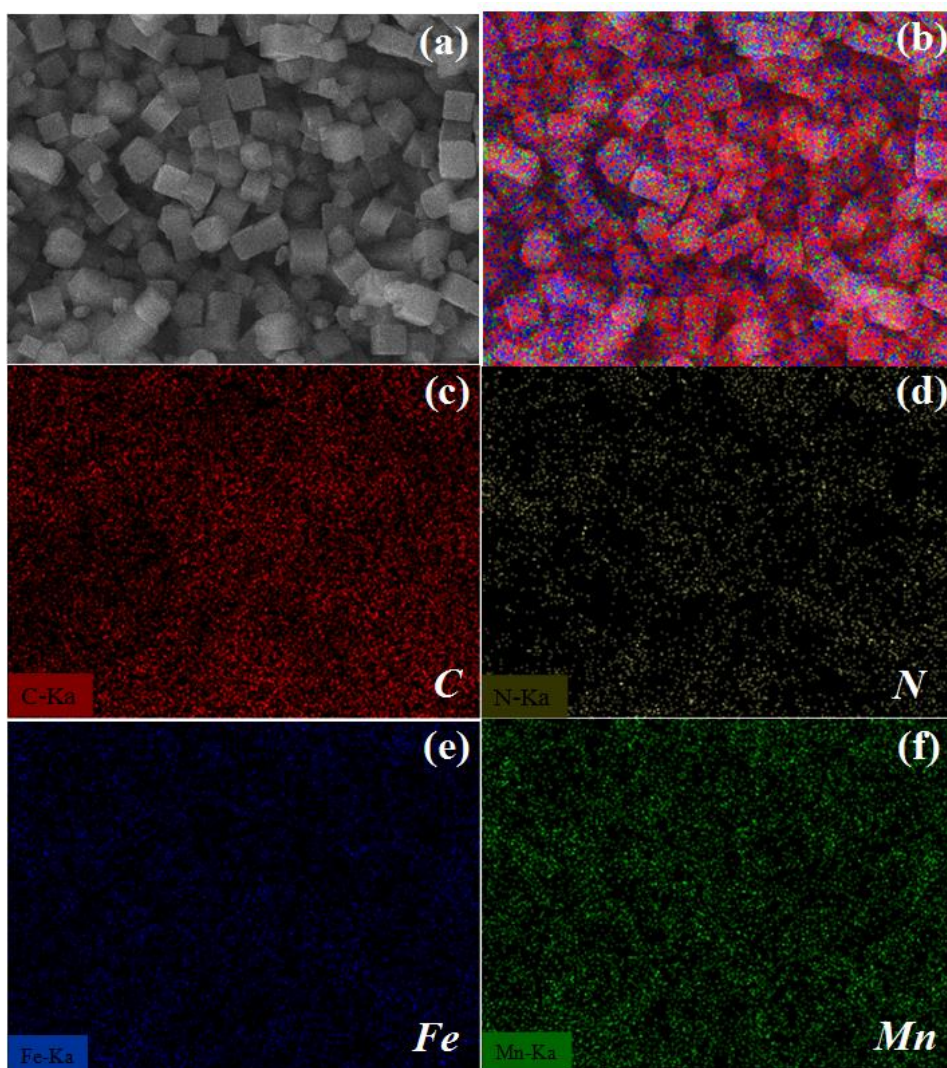

**Fig. S2** Elemental mapping images of  $\text{Mn}[\text{Fe}(\text{CN})_6]_{0.6667} \cdot n\text{H}_2\text{O}$  cubes.

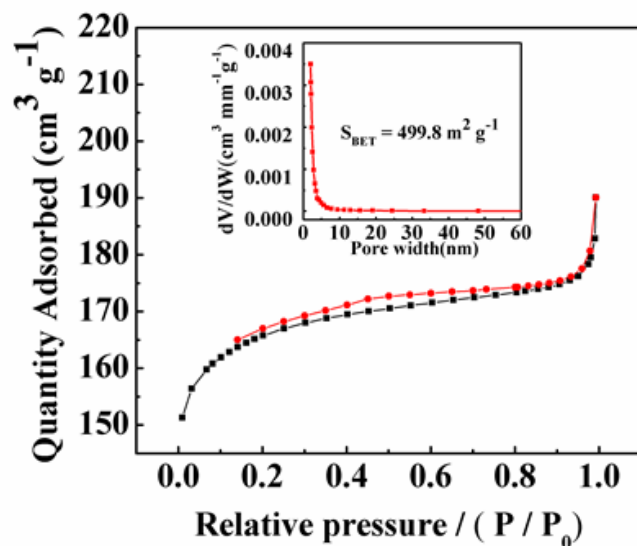

**Fig. S3** N<sub>2</sub> adsorption-desorption isotherm and the corresponding pore size distribution (inset) of Mn[Fe(CN)<sub>6</sub>]<sub>0.6667</sub>·nH<sub>2</sub>O cubes.

**Table S1** A comparison of the capacity of present work with reported PBAs as anode for LIBs.

| Samples                                                                   | Current density (mA g <sup>-1</sup> ) | Cycle number | Capacity (mA h g <sup>-1</sup> ) | Ref.      |
|---------------------------------------------------------------------------|---------------------------------------|--------------|----------------------------------|-----------|
| Mn[Fe(CN) <sub>6</sub> ] <sub>0.6667</sub> ·nH <sub>2</sub> O             | 200                                   | 100          | 295.7                            | This work |
| Mn <sub>3</sub> [Co(CN) <sub>6</sub> ] <sub>2</sub> ·nH <sub>2</sub> O    | 50                                    | 100          | 35.3                             | 19        |
| CoHCF NPs                                                                 | 100                                   | 30           | 325                              | 25        |
| K <sub>1-x</sub> Fe <sub>2+x/3</sub> (CN) <sub>6</sub> ·yH <sub>2</sub> O | 175                                   | 100          | <200                             | 31        |

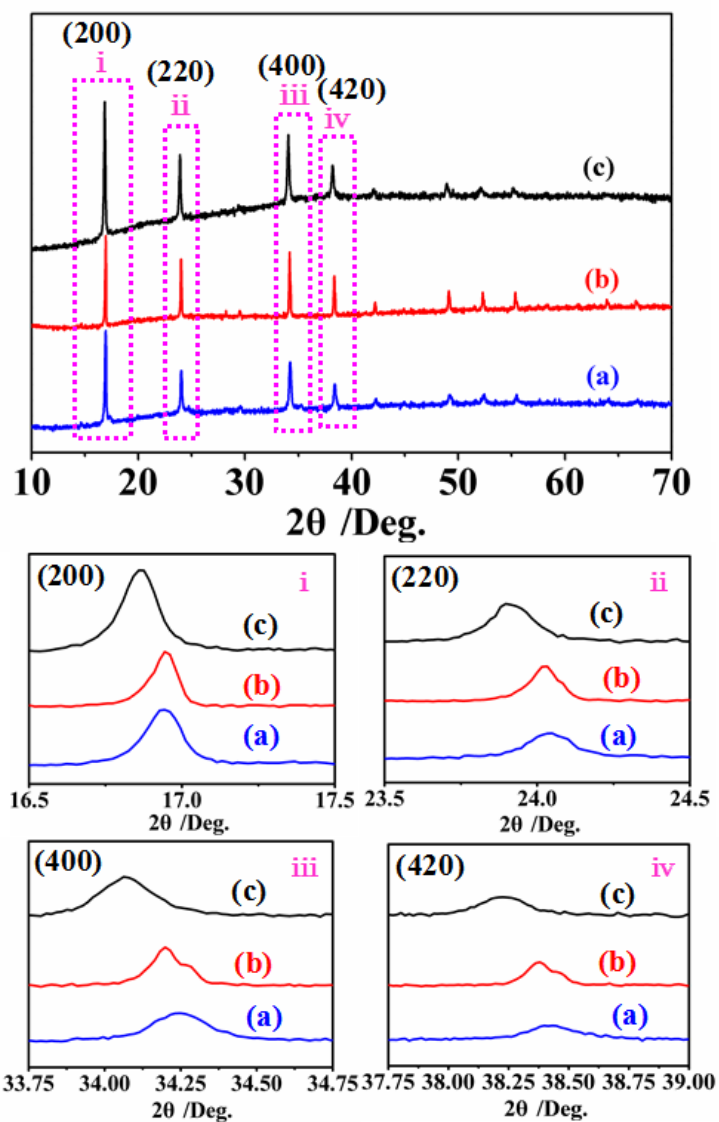

**Fig S4** XRD patterns of the as-prepared Mn-PBA: (a) without thermal treatment; (b) with thermal treatment at 110 °C under vacuum for 12 h; (c) with thermal treatment at 220 °C for 3 h under N<sub>2</sub> atmosphere (Mn-PBA-T).

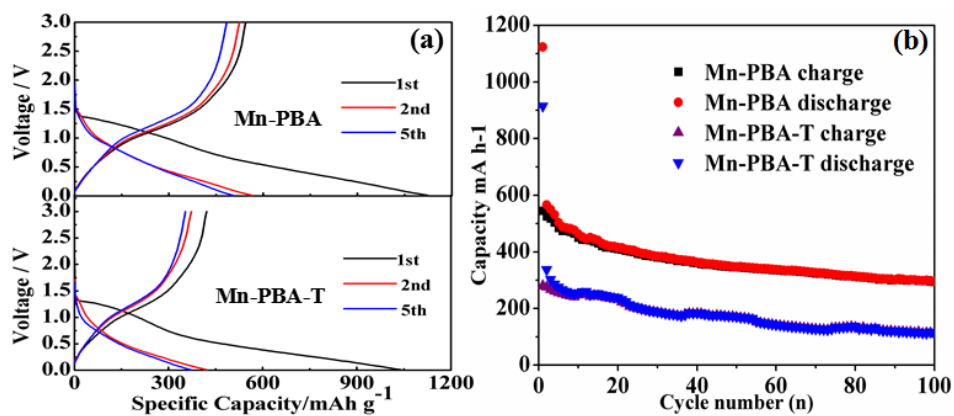

**Fig S5** (a) Charge-discharge profiles of Mn-PBA and Mn-PBA-T for the 1st, 2nd, and 5th cycles; (b) Cycling performance of Mn-PBA and Mn-PBA-T at a current density of 200 mA g<sup>-1</sup>.
